# Supplementary material for: Characterization of lncRNA–miRNA–mRNA Network to Reveal Potential Functional ceRNAs in Bovine Skeletal Muscle
Source: Front Genet. 2019 Feb 20;10:91. doi: 10.3389/fgene.2019.00091 (PMC6391848; doi:10.3389/fgene.2019.00091)
Supplement: Supplementary file 3 [file Table_3.XLSX]

## Sheet: HALLMARK_MYOGENES
Supplementary table 3 HALLMARK_MYOGENESIS result
NAME	PROBE	DESCRIPTION<br>(from dataset)	GENE SYMBOL	GENE_TITLE	RANK IN GENE LIST	RANK METRIC SCORE	RUNNING ES	CORE ENRICHMENT
row_0	MYL7	na	null	null	0	4.98621	0.012366	No
row_1	MYL4	na	null	null	4	4.88978	0.0243346	No
row_2	TNNT2	na	null	null	49	4.33652	0.032767	No
row_3	KCNH2	na	null	null	67	4.21835	0.0423314	No
row_4	ACTC1	na	null	null	123	3.98873	0.0493206	No
row_5	CACNA1H	na	null	null	216	3.69163	0.0536201	No
row_6	EPHB3	na	null	null	228	3.66365	0.0621255	No
row_7	ERBB3	na	null	null	250	3.60785	0.0699648	No
row_8	NAV2	na	null	null	298	3.50462	0.0761756	No
row_9	PVALB	na	null	null	562	2.97233	0.0696656	No
row_10	NCAM1	na	null	null	611	2.9137	0.0743582	No
row_11	NOTCH1	na	null	null	614	2.90962	0.0814686	No
row_12	ADAM12	na	null	null	666	2.84058	0.0858215	No
row_13	SPHK1	na	null	null	1099	2.34671	0.0688398	No
row_14	COL1A1	na	null	null	1134	2.31843	0.0727951	No
row_15	APLNR	na	null	null	1225	2.22989	0.073575	No
row_16	CKB	na	null	null	1337	2.15334	0.0730566	No
row_17	PPFIA4	na	null	null	1353	2.14405	0.0775822	No
row_18	FST	na	null	null	1364	2.13644	0.0823529	No
row_19	AGRN	na	null	null	1496	2.04304	0.0805054	No
row_20	STC2	na	null	null	1634	1.94518	0.0780984	No
row_21	MYH11	na	null	null	1815	1.82223	0.0731169	No
row_22	COL4A2	na	null	null	2275	1.60503	0.0528707	No
row_23	PLXNB2	na	null	null	2355	1.57341	0.0526031	No
row_24	SPTAN1	na	null	null	2403	1.55379	0.0539758	No
row_25	PSEN2	na	null	null	2553	1.49087	0.0498088	No
row_26	KIFC3	na	null	null	2935	1.35252	0.0330534	No
row_27	FKBP1B	na	null	null	3205	1.27132	0.022008	No
row_28	KCNH1	na	null	null	3803	1.11088	-0.00674754	No
row_29	IGFBP3	na	null	null	3816	1.10758	-0.00463407	No
row_30	MYBPC3	na	null	null	3845	1.09956	-0.00338499	No
row_31	KLF5	na	null	null	3982	1.06202	-0.00792943	No
row_32	ST5	na	null	null	4723	0.895478	-0.044767	No
row_33	COX7A1	na	null	null	4927	0.856436	-0.0533576	No
row_34	TPD52L1	na	null	null	4990	0.845237	-0.0545339	No
row_35	TGFB1	na	null	null	5309	0.790207	-0.0693587	No
row_36	GNAO1	na	null	null	5877	0.695504	-0.0975609	No
row_37	BDKRB2	na	null	null	6034	0.667932	-0.104138	No
row_38	APP	na	null	null	6744	0.565544	-0.140158	No
row_39	SPDEF	na	null	null	6828	0.551473	-0.143171	No
row_40	NQO1	na	null	null	8074	0.318778	-0.208094	No
row_41	COL6A2	na	null	null	8082	0.316324	-0.207679	No
row_42	MYH9	na	null	null	8189	0.291883	-0.21255	No
row_43	CDKN1A	na	null	null	8275	0.269774	-0.216367	No
row_44	VIPR1	na	null	null	9088	0.0896165	-0.259003	No
row_45	CTF1	na	null	null	9194	0.0649423	-0.264384	No
row_46	CASQ2	na	null	null	9203	0.0619256	-0.264653	No
row_47	SPARC	na	null	null	9464	-0.0300149	-0.278302	No
row_48	CNN3	na	null	null	9714	-0.146257	-0.291082	No
row_49	MYO1C	na	null	null	9740	-0.155602	-0.292015	No
row_50	CHRNA1	na	null	null	10220	-0.369977	-0.31638	No
row_51	GJA5	na	null	null	10265	-0.390752	-0.317733	No
row_52	PTGIS	na	null	null	10342	-0.427066	-0.320686	No
row_53	COL15A1	na	null	null	10646	-0.562972	-0.335282	No
row_54	PC	na	null	null	10683	-0.577844	-0.335749	No
row_55	SORBS3	na	null	null	10692	-0.580302	-0.334732	No
row_56	MRAS	na	null	null	10749	-0.604662	-0.336189	No
row_57	COL6A3	na	null	null	10883	-0.666467	-0.341556	No
row_58	IFRD1	na	null	null	10905	-0.676027	-0.340988	No
row_59	MYOG	na	null	null	11113	-0.760951	-0.350026	No
row_60	WWTR1	na	null	null	11150	-0.776246	-0.350001	No
row_61	SMTN	na	null	null	11180	-0.788294	-0.349577	No
row_62	FGF2	na	null	null	11256	-0.820423	-0.351501	No
row_63	TSC2	na	null	null	11531	-0.929635	-0.363657	No
row_64	APOD	na	null	null	11673	-0.995216	-0.368631	No
row_65	MYL6B	na	null	null	11777	-1.02944	-0.371515	No
row_66	ITGB4	na	null	null	11791	-1.03393	-0.369637	No
row_67	MYH4	na	null	null	12018	-1.13253	-0.378757	No
row_68	SCD	na	null	null	12236	-1.21736	-0.387191	No
row_69	CSRP3	na	null	null	12337	-1.25387	-0.38936	No
row_70	PPP1R3C	na	null	null	12381	-1.26762	-0.388486	No
row_71	MEF2C	na	null	null	12669	-1.36182	-0.400257	No
row_72	MEF2D	na	null	null	12693	-1.36745	-0.398079	No
row_73	IGFBP7	na	null	null	12807	-1.41556	-0.400533	No
row_74	BHLHE40	na	null	null	12849	-1.42769	-0.399156	No
row_75	SLC6A8	na	null	null	13084	-1.50856	-0.407766	No
row_76	HSPB8	na	null	null	13305	-1.58304	-0.415452	Yes
row_77	LPIN1	na	null	null	13321	-1.5869	-0.412308	Yes
row_78	HDAC5	na	null	null	13334	-1.59015	-0.408998	Yes
row_79	HSPB2	na	null	null	13398	-1.60383	-0.408345	Yes
row_80	GPX3	na	null	null	13500	-1.64009	-0.409609	Yes
row_81	MAPRE3	na	null	null	13575	-1.66009	-0.409397	Yes
row_82	RB1	na	null	null	13647	-1.68098	-0.408976	Yes
row_83	CRYAB	na	null	null	13690	-1.69359	-0.406993	Yes
row_84	MYL2	na	null	null	13748	-1.71658	-0.405744	Yes
row_85	GAA	na	null	null	13799	-1.73138	-0.404089	Yes
row_86	TNNT1	na	null	null	13922	-1.76834	-0.406143	Yes
row_87	ADCY9	na	null	null	14153	-1.83511	-0.413732	Yes
row_88	COL3A1	na	null	null	14154	-1.83523	-0.40918	Yes
row_89	LSP1	na	null	null	14219	-1.85396	-0.40796	Yes
row_90	MYH7	na	null	null	14339	-1.88452	-0.409568	Yes
row_91	HBEGF	na	null	null	14384	-1.89566	-0.407189	Yes
row_92	CAV3	na	null	null	14506	-1.92911	-0.408791	Yes
row_93	CKMT2	na	null	null	14521	-1.93331	-0.404735	Yes
row_94	MYBPH	na	null	null	14593	-1.95009	-0.403646	Yes
row_95	FDPS	na	null	null	14628	-1.95843	-0.400584	Yes
row_96	TPM3	na	null	null	14680	-1.97254	-0.398384	Yes
row_97	AKT2	na	null	null	14856	-2.01961	-0.402612	Yes
row_98	SGCA	na	null	null	14918	-2.03387	-0.400787	Yes
row_99	PDLIM7	na	null	null	14948	-2.04284	-0.397252	Yes
row_100	AK1	na	null	null	14949	-2.04297	-0.392185	Yes
row_101	ITGA7	na	null	null	15153	-2.09113	-0.397714	Yes
row_102	ABLIM1	na	null	null	15192	-2.10313	-0.394503	Yes
row_103	CKM	na	null	null	15350	-2.15078	-0.397456	Yes
row_104	MAPK12	na	null	null	15392	-2.16522	-0.39425	Yes
row_105	MYF6	na	null	null	15408	-2.17031	-0.38966	Yes
row_106	RIT1	na	null	null	15475	-2.18661	-0.38772	Yes
row_107	GADD45B	na	null	null	15487	-2.19026	-0.382869	Yes
row_108	SIRT2	na	null	null	15551	-2.20387	-0.380728	Yes
row_109	BAG1	na	null	null	15559	-2.20675	-0.375625	Yes
row_110	DMPK	na	null	null	15619	-2.22529	-0.37322	Yes
row_111	SORBS1	na	null	null	15688	-2.24543	-0.371241	Yes
row_112	FOXO4	na	null	null	15739	-2.25911	-0.368277	Yes
row_113	SH2B1	na	null	null	15883	-2.29749	-0.370127	Yes
row_114	TNNC1	na	null	null	15918	-2.30834	-0.366197	Yes
row_115	FABP3	na	null	null	16164	-2.38358	-0.373217	Yes
row_116	ACSL1	na	null	null	16212	-2.39861	-0.369749	Yes
row_117	ATP6AP1	na	null	null	16214	-2.40005	-0.36385	Yes
row_118	REEP1	na	null	null	16241	-2.41057	-0.359243	Yes
row_119	ITGB1	na	null	null	16325	-2.43633	-0.357582	Yes
row_120	TNNC2	na	null	null	16335	-2.43923	-0.352008	Yes
row_121	FLII	na	null	null	16575	-2.5159	-0.358383	Yes
row_122	LAMA2	na	null	null	16623	-2.52907	-0.354592	Yes
row_123	SVIL	na	null	null	16692	-2.55122	-0.351854	Yes
row_124	SGCG	na	null	null	16783	-2.58011	-0.350205	Yes
row_125	GSN	na	null	null	16797	-2.58392	-0.344483	Yes
row_126	MB	na	null	null	17022	-2.66486	-0.349697	Yes
row_127	PTP4A3	na	null	null	17036	-2.67043	-0.343761	Yes
row_128	LDB3	na	null	null	17050	-2.67625	-0.337809	Yes
row_129	PYGM	na	null	null	17340	-2.79151	-0.34614	Yes
row_130	EIF4A2	na	null	null	17372	-2.80482	-0.34082	Yes
row_131	TAGLN	na	null	null	17386	-2.81006	-0.334537	Yes
row_132	PFKM	na	null	null	17480	-2.8529	-0.332371	Yes
row_133	ITGB5	na	null	null	17498	-2.86574	-0.326161	Yes
row_134	SPEG	na	null	null	17552	-2.89479	-0.321779	Yes
row_135	AGL	na	null	null	17675	-2.95859	-0.320881	Yes
row_136	BIN1	na	null	null	17713	-2.97791	-0.315449	Yes
row_137	ANKRD2	na	null	null	17717	-2.98096	-0.308214	Yes
row_138	TNNI2	na	null	null	17885	-3.06232	-0.309434	Yes
row_139	MYLK	na	null	null	17886	-3.06353	-0.301836	Yes
row_140	HRC	na	null	null	17939	-3.09225	-0.296912	Yes
row_141	SH3BGR	na	null	null	17950	-3.09914	-0.289754	Yes
row_142	SGCD	na	null	null	17992	-3.1303	-0.284154	Yes
row_143	PKIA	na	null	null	18001	-3.13504	-0.276802	Yes
row_144	ATP2A1	na	null	null	18004	-3.13991	-0.26912	Yes
row_145	NOS1	na	null	null	18051	-3.16447	-0.2637	Yes
row_146	CLU	na	null	null	18080	-3.18591	-0.257277	Yes
row_147	CACNG1	na	null	null	18087	-3.18872	-0.249685	Yes
row_148	CDH13	na	null	null	18096	-3.1987	-0.242175	Yes
row_149	TNNI1	na	null	null	18120	-3.21282	-0.235421	Yes
row_150	CASQ1	na	null	null	18137	-3.22246	-0.228273	Yes
row_151	ENO3	na	null	null	18181	-3.24985	-0.222483	Yes
row_152	TNNT3	na	null	null	18319	-3.36623	-0.221366	Yes
row_153	DAPK2	na	null	null	18425	-3.46002	-0.218327	Yes
row_154	MYOM2	na	null	null	18445	-3.48932	-0.210676	Yes
row_155	SSPN	na	null	null	18466	-3.51028	-0.203026	Yes
row_156	TEAD4	na	null	null	18540	-3.5782	-0.198005	Yes
row_157	DMD	na	null	null	18697	-3.75705	-0.196921	Yes
row_158	SYNGR2	na	null	null	18737	-3.81072	-0.189529	Yes
row_159	CAMK2B	na	null	null	18764	-3.85071	-0.181351	Yes
row_160	DTNA	na	null	null	18846	-4.02454	-0.175646	Yes
row_161	PGAM2	na	null	null	18848	-4.0282	-0.165708	Yes
row_162	PDE4DIP	na	null	null	18929	-4.21798	-0.15947	Yes
row_163	GABARAPL2	na	null	null	18930	-4.21931	-0.149006	Yes
row_164	MEF2A	na	null	null	18938	-4.2384	-0.138864	Yes
row_165	MYOM1	na	null	null	18943	-4.24823	-0.128539	Yes
row_166	DES	na	null	null	19010	-4.46134	-0.120958	Yes
row_167	LARGE	na	null	null	19012	-4.46441	-0.109939	Yes
row_168	COX6A2	na	null	null	19013	-4.46565	-0.0988643	Yes
row_169	ACTN2	na	null	null	19019	-4.48085	-0.0880154	Yes
row_170	CFD	na	null	null	19024	-4.50599	-0.0770515	Yes
row_171	FXYD1	na	null	null	19039	-4.56552	-0.0664678	Yes
row_172	MYL3	na	null	null	19047	-4.59288	-0.0554467	Yes
row_173	SCHIP1	na	null	null	19080	-4.70495	-0.0454672	Yes
row_174	MYLPF	na	null	null	19089	-4.75054	-0.0341079	Yes
row_175	FHL1	na	null	null	19099	-4.79788	-0.022684	Yes
row_176	TCAP	na	null	null	19102	-4.80668	-0.0108687	Yes
row_177	CD36	na	null	null	19103	-4.80812	0.00105562	Yes
