# Supplementary material for: Characterization of lncRNA–miRNA–mRNA Network to Reveal Potential Functional ceRNAs in Bovine Skeletal Muscle
Source: Front Genet. 2019 Feb 20;10:91. doi: 10.3389/fgene.2019.00091 (PMC6391848; doi:10.3389/fgene.2019.00091)
Supplement: Supplementary file 4 [file Table_4.XLSX]

## Sheet: TGTGTGA_MIR377
Supplementary table 4 TGTGTGA_MIR377 result
NAME	PROBE	DESCRIPTION<br>(from dataset)	GENE SYMBOL	GENE_TITLE	RANK IN GENE LIST	RANK METRIC SCORE	RUNNING ES	CORE ENRICHMENT
row_0	CPLX3	na	null	null	577	2.94968	-0.0196196	No
row_1	PRX	na	null	null	652	2.86236	-0.0130257	No
row_2	KIAA1024	na	null	null	667	2.83813	-0.00335555	No
row_3	NRK	na	null	null	678	2.8266	0.00648328	No
row_4	DHCR24	na	null	null	804	2.65936	0.00964243	No
row_5	RNF165	na	null	null	831	2.62324	0.0178914	No
row_6	PRR7	na	null	null	1625	1.94975	-0.0167895	No
row_7	CDON	na	null	null	1627	1.94864	-0.00969574	No
row_8	FAT2	na	null	null	1786	1.84416	-0.0112671	No
row_9	CUL1	na	null	null	2273	1.60576	-0.031015	No
row_10	KLHL35	na	null	null	2760	1.4134	-0.0514685	No
row_11	RNF182	na	null	null	2906	1.36081	-0.0541267	No
row_12	PHF21A	na	null	null	3108	1.29775	-0.0599702	No
row_13	EPB49	na	null	null	3490	1.19141	-0.0756989	No
row_14	WHSC1	na	null	null	3765	1.12117	-0.0860409	No
row_15	NKX2-2	na	null	null	3782	1.1176	-0.0827862	No
row_16	LMX1A	na	null	null	4147	1.02442	-0.0982305	No
row_17	CAPN5	na	null	null	4300	0.990439	-0.102616	No
row_18	NR6A1	na	null	null	4470	0.949901	-0.108048	No
row_19	GPR85	na	null	null	4508	0.941092	-0.106548	No
row_20	DNAJC6	na	null	null	4715	0.897836	-0.114122	No
row_21	AGPAT4	na	null	null	4806	0.880598	-0.11564	No
row_22	KLK10	na	null	null	4870	0.866648	-0.115785	No
row_23	PRTG	na	null	null	6041	0.667141	-0.175057	No
row_24	ZFP36L1	na	null	null	6465	0.607398	-0.195143	No
row_25	HAO2	na	null	null	6528	0.596959	-0.196224	No
row_26	NBEA	na	null	null	6633	0.582897	-0.199573	No
row_27	PTMA	na	null	null	6644	0.580254	-0.197972	No
row_28	AMACR	na	null	null	6848	0.546158	-0.206677	No
row_29	EGR2	na	null	null	7791	0.377725	-0.254984	No
row_30	NRG1	na	null	null	7962	0.344341	-0.262688	No
row_31	PTPRN	na	null	null	8226	0.282115	-0.275527	No
row_32	STK35	na	null	null	8436	0.232101	-0.285701	No
row_33	ATXN2L	na	null	null	8721	0.175438	-0.300039	No
row_34	H6PD	na	null	null	8850	0.14745	-0.30625	No
row_35	CD93	na	null	null	9333	0.019831	-0.331603	No
row_36	ADRA2B	na	null	null	9573	-0.0824088	-0.343909	No
row_37	PITX2	na	null	null	9594	-0.0914678	-0.344628	No
row_38	JAG1	na	null	null	9685	-0.131805	-0.348892	No
row_39	TRIOBP	na	null	null	9724	-0.151753	-0.35034	No
row_40	ARID1A	na	null	null	10040	-0.294529	-0.365877	No
row_41	NCOA6	na	null	null	10194	-0.358122	-0.372634	No
row_42	CELF2	na	null	null	10313	-0.41231	-0.377347	No
row_43	MAP1A	na	null	null	10327	-0.42119	-0.376488	No
row_44	LAMC1	na	null	null	10363	-0.434671	-0.37674	No
row_45	CAMTA1	na	null	null	10368	-0.437344	-0.375347	No
row_46	PLCB1	na	null	null	10588	-0.540046	-0.384919	No
row_47	EGR1	na	null	null	10746	-0.604126	-0.390985	No
row_48	RPGRIP1L	na	null	null	10774	-0.616452	-0.390149	No
row_49	ZEB2	na	null	null	10781	-0.618375	-0.388197	No
row_50	MADD	na	null	null	10790	-0.62006	-0.386345	No
row_51	PRKD1	na	null	null	10814	-0.631416	-0.385243	No
row_52	ZBTB4	na	null	null	11099	-0.756304	-0.397451	No
row_53	PPM1F	na	null	null	11118	-0.762337	-0.395604	No
row_54	BAZ2A	na	null	null	11208	-0.803604	-0.397352	No
row_55	NAPB	na	null	null	11227	-0.810876	-0.395328	No
row_56	VEGFA	na	null	null	11384	-0.869189	-0.400369	No
row_57	UNC45A	na	null	null	11391	-0.874641	-0.397478	No
row_58	KIF2A	na	null	null	11416	-0.882077	-0.395509	No
row_59	CAMK2N2	na	null	null	11429	-0.885701	-0.392894	No
row_60	HMOX1	na	null	null	11699	-1.00343	-0.403404	No
row_61	PDGFRA	na	null	null	11784	-1.03265	-0.404048	Yes
row_62	WHSC2	na	null	null	11801	-1.03871	-0.401082	Yes
row_63	GGA3	na	null	null	11830	-1.05158	-0.398703	Yes
row_64	JAZF1	na	null	null	11857	-1.05993	-0.396187	Yes
row_65	2017-03-03	na	null	null	11921	-1.0866	-0.395525	Yes
row_66	DLGAP4	na	null	null	11985	-1.1158	-0.394757	Yes
row_67	CACNA2D2	na	null	null	12091	-1.16115	-0.396037	Yes
row_68	TTC23L	na	null	null	12094	-1.16503	-0.39187	Yes
row_69	EDNRB	na	null	null	12099	-1.168	-0.387797	Yes
row_70	GLYR1	na	null	null	12225	-1.2138	-0.38994	Yes
row_71	FOXN3	na	null	null	12227	-1.21395	-0.38554	Yes
row_72	CSRNP3	na	null	null	12234	-1.2168	-0.381394	Yes
row_73	FNBP1L	na	null	null	12273	-1.23248	-0.378879	Yes
row_74	SUMF1	na	null	null	12321	-1.24831	-0.37678	Yes
row_75	ARGLU1	na	null	null	12419	-1.28299	-0.377192	Yes
row_76	RET	na	null	null	12466	-1.29625	-0.374864	Yes
row_77	ZFX	na	null	null	12641	-1.35332	-0.37908	Yes
row_78	UBP1	na	null	null	12695	-1.36785	-0.376859	Yes
row_79	MAX	na	null	null	12818	-1.41956	-0.378089	Yes
row_80	C2CD2L	na	null	null	12861	-1.43049	-0.375058	Yes
row_81	KLHL9	na	null	null	12879	-1.43536	-0.370691	Yes
row_82	NT5C3L	na	null	null	12994	-1.48026	-0.371275	Yes
row_83	SLC39A10	na	null	null	13014	-1.48708	-0.366824	Yes
row_84	CPSF6	na	null	null	13038	-1.49478	-0.362555	Yes
row_85	FZD4	na	null	null	13078	-1.50697	-0.359086	Yes
row_86	SLC6A8	na	null	null	13084	-1.50856	-0.353817	Yes
row_87	ETS1	na	null	null	13108	-1.51862	-0.349461	Yes
row_88	HDAC9	na	null	null	13175	-1.54049	-0.347293	Yes
row_89	ZNF462	na	null	null	13201	-1.54874	-0.342932	Yes
row_90	SRSF1	na	null	null	13237	-1.56308	-0.339045	Yes
row_91	ABCA9	na	null	null	13322	-1.58698	-0.337656	Yes
row_92	FMR1	na	null	null	13336	-1.59055	-0.332509	Yes
row_93	NUP153	na	null	null	13359	-1.59492	-0.32782	Yes
row_94	RSBN1	na	null	null	13386	-1.60139	-0.323319	Yes
row_95	TP63	na	null	null	13408	-1.60885	-0.318526	Yes
row_96	VCPIP1	na	null	null	13459	-1.62488	-0.315205	Yes
row_97	HMBOX1	na	null	null	13468	-1.62933	-0.309651	Yes
row_98	ADARB1	na	null	null	13729	-1.70825	-0.317101	Yes
row_99	ARID4B	na	null	null	13742	-1.7129	-0.311453	Yes
row_100	SLC11A2	na	null	null	13760	-1.72003	-0.306041	Yes
row_101	AZIN1	na	null	null	13947	-1.77598	-0.30934	Yes
row_102	RICTOR	na	null	null	13997	-1.79563	-0.305339	Yes
row_103	CREBL2	na	null	null	14028	-1.80371	-0.300307	Yes
row_104	ATXN7	na	null	null	14080	-1.81913	-0.296325	Yes
row_105	THADA	na	null	null	14227	-1.85681	-0.297217	Yes
row_106	MRFAP1	na	null	null	14361	-1.89026	-0.297301	Yes
row_107	CPEB4	na	null	null	14376	-1.89409	-0.291093	Yes
row_108	BCL2L1	na	null	null	14478	-1.92005	-0.289379	Yes
row_109	PHF6	na	null	null	14485	-1.92264	-0.282644	Yes
row_110	NDEL1	na	null	null	14509	-1.93024	-0.276779	Yes
row_111	ARL8B	na	null	null	14580	-1.94711	-0.27333	Yes
row_112	RNF145	na	null	null	14599	-1.95183	-0.267122	Yes
row_113	ATXN7L1	na	null	null	14726	-1.98447	-0.26649	Yes
row_114	CUL4A	na	null	null	14756	-1.99443	-0.260706	Yes
row_115	PSME4	na	null	null	14760	-1.99512	-0.253547	Yes
row_116	RPS6KB1	na	null	null	14896	-2.02798	-0.253231	Yes
row_117	CTCF	na	null	null	15146	-2.08854	-0.258706	Yes
row_118	EYA4	na	null	null	15149	-2.08969	-0.251148	Yes
row_119	BAZ2B	na	null	null	15162	-2.09557	-0.244096	Yes
row_120	LRP12	na	null	null	15206	-2.10732	-0.238636	Yes
row_121	PRPF4B	na	null	null	15239	-2.11563	-0.232565	Yes
row_122	RASA1	na	null	null	15240	-2.11701	-0.224801	Yes
row_123	PUM1	na	null	null	15536	-2.20023	-0.232293	Yes
row_124	KLHL2	na	null	null	15550	-2.20359	-0.224897	Yes
row_125	KPNB1	na	null	null	15586	-2.2155	-0.218618	Yes
row_126	ARID1B	na	null	null	15613	-2.22405	-0.211833	Yes
row_127	TRMT11	na	null	null	15628	-2.22786	-0.204401	Yes
row_128	MIER1	na	null	null	15667	-2.23851	-0.198196	Yes
row_129	FUT8	na	null	null	15717	-2.25404	-0.192515	Yes
row_130	ARHGAP21	na	null	null	15736	-2.25869	-0.185181	Yes
row_131	STRN4	na	null	null	15743	-2.25971	-0.17721	Yes
row_132	BTBD7	na	null	null	15753	-2.26503	-0.169378	Yes
row_133	OSGIN2	na	null	null	15782	-2.27288	-0.162519	Yes
row_134	UBE2L3	na	null	null	15803	-2.27905	-0.155216	Yes
row_135	TMED2	na	null	null	15851	-2.29058	-0.149295	Yes
row_136	FAM105B	na	null	null	15868	-2.29498	-0.141722	Yes
row_137	NAA15	na	null	null	15928	-2.31138	-0.136357	Yes
row_138	RBPMS	na	null	null	16015	-2.33888	-0.132316	Yes
row_139	RABGAP1	na	null	null	16080	-2.35682	-0.127049	Yes
row_140	SOD1	na	null	null	16227	-2.40567	-0.125928	Yes
row_141	REEP1	na	null	null	16241	-2.41057	-0.117773	Yes
row_142	PHF3	na	null	null	16283	-2.42338	-0.111048	Yes
row_143	TMX1	na	null	null	16414	-2.46728	-0.108857	Yes
row_144	GRSF1	na	null	null	16564	-2.5133	-0.1075	Yes
row_145	ARMC8	na	null	null	16650	-2.53534	-0.102686	Yes
row_146	EIF4E	na	null	null	16652	-2.53552	-0.0934396	Yes
row_147	CNOT7	na	null	null	16658	-2.54011	-0.0843877	Yes
row_148	UBE2D2	na	null	null	16703	-2.55497	-0.0773385	Yes
row_149	KCNMA1	na	null	null	16920	-2.63313	-0.0790759	Yes
row_150	TAPT1	na	null	null	16988	-2.65356	-0.0728785	Yes
row_151	RNF38	na	null	null	17077	-2.6851	-0.0676732	Yes
row_152	SRF	na	null	null	17139	-2.70908	-0.0609556	Yes
row_153	EFTUD1	na	null	null	17201	-2.73483	-0.0541436	Yes
row_154	ZDHHC14	na	null	null	17246	-2.75442	-0.046363	Yes
row_155	XIAP	na	null	null	17278	-2.76811	-0.0378465	Yes
row_156	SRPK2	na	null	null	17488	-2.85811	-0.0383895	Yes
row_157	CDKN1B	na	null	null	17616	-2.92169	-0.0343738	Yes
row_158	SSFA2	na	null	null	17762	-3.0016	-0.0310145	Yes
row_159	QKI	na	null	null	18144	-3.22738	-0.0392765	Yes
row_160	GTPBP8	na	null	null	18278	-3.32585	-0.0340951	Yes
row_161	TRIP12	na	null	null	18344	-3.38426	-0.0251123	Yes
row_162	H3F3A	na	null	null	18390	-3.42081	-0.0149406	Yes
row_163	TEAD1	na	null	null	18396	-3.42947	-0.00262699	Yes
row_164	MDM2	na	null	null	18443	-3.48489	0.00772706	Yes
row_165	CAP2	na	null	null	18682	-3.74588	0.00891006	Yes
row_166	S1PR1	na	null	null	18789	-3.89927	0.0176187	Yes
