# Supplementary material for: Characterization of lncRNA–miRNA–mRNA Network to Reveal Potential Functional ceRNAs in Bovine Skeletal Muscle
Source: Front Genet. 2019 Feb 20;10:91. doi: 10.3389/fgene.2019.00091 (PMC6391848; doi:10.3389/fgene.2019.00091)
Supplement: Supplementary file 6 [file Table_6.XLSX]

## Sheet: 251
Supplementary table 6 miRNA high-throughput sequencing result
miR name	FM expressed	AM expressed	FM std	AM std	Fold change (log2 AM/FM)	P-value
bta-let-7a	1271763	300742	82292.5	22181.6	-1.8914	0
bta-let-7b	498176	167621	32235.7	12363.1	-1.38262	0
bta-let-7c	504590	80275	32650.7	5920.79	-2.46325	0
bta-let-7d	55935	8213	3619.41	605.76	-2.57893	0
bta-let-7e	193129	10355	12496.9	763.746	-4.03233	0
bta-let-7f	1434682	326934	92834.5	24113.4	-1.94482	0
bta-let-7g	132746	34666	8589.65	2556.84	-1.74824	0
bta-let-7i	150286	7630	9724.62	562.761	-4.11105	0
bta-miR-1	2081364	9799576	134680	722780	2.42403	0
bta-miR-100	1711	272	110.714	20.0617	-2.46433	1.0132e-215
bta-miR-101	19658	11838	1272.02	873.127	-0.542856	2.1903e-235
bta-miR-103	55675	6091	3602.58	449.25	-3.00344	0
bta-miR-106b	608	53	39.3421	3.9091	-3.33117	1.5765e-105
bta-miR-107	46398	4158	3002.29	306.679	-3.29127	0
bta-miR-10a	4836	398	312.925	29.355	-3.41414	0
bta-miR-10b	6701	544	433.604	40.1234	-3.43386	0
bta-miR-1185	452	5	29.2477	0.3688	-6.30934	9.0791e-115
bta-miR-1197	45	0	2.9118	0.01	-8.18577	5.22801e-13
bta-miR-122	593	1	38.3715	0.0738	-9.0222	1.8413e-160
bta-miR-125a	3711	372	240.129	27.4373	-3.1296	0
bta-miR-125b	5729	1069	370.709	78.8455	-2.23319	0
bta-miR-126	60	27	3.8824	1.9914	-0.963166	0.00316703
bta-miR-126*	243	119	15.7239	8.777	-0.841159	9.27203e-08
bta-miR-127	36917	153	2388.8	11.2847	-7.72578	0
bta-miR-1271	113	10	7.3119	0.7376	-3.30934	1.17884e-20
bta-miR-128	42227	6424	2732.4	473.81	-2.52779	0
bta-miR-129-3p	143	0	9.2532	0.01	-9.85381	8.16069e-40
bta-miR-1306	179	15	11.5826	1.1063	-3.38814	1.39823e-32
bta-miR-1307	2246	299	145.333	22.0531	-2.72031	2.39166586384301e-315
bta-miR-130a	3050	59	197.358	4.3516	-5.50312	0
bta-miR-130b	711	5	46.007	0.3688	-6.96287	1.221e-184
bta-miR-133a	9691	18927	627.08	1395.99	1.15456	0
bta-miR-133b	6095	4149	394.392	306.015	-0.366027	6.77852e-37
bta-miR-134	19	0	1.2294	0.01	-6.94181	6.7654e-06
bta-miR-136	1046	4	67.6839	0.295	-7.84195	1.9591e-277
bta-miR-138	24	1	1.553	0.0738	-4.39529	3.67989e-06
bta-miR-139	442	80	28.6007	5.9005	-2.27714	4.47052e-52
bta-miR-140	45836	13248	2965.93	977.124	-1.60187	0
bta-miR-142	176	47	11.3885	3.4665	-1.71603	2.00155e-15
bta-miR-143	10038	4815	649.533	355.137	-0.871029	3.5832e-275
bta-miR-144	135	0	8.7355	0.01	-9.77075	1.25899e-37
bta-miR-145	1053	489	68.1369	36.0668	-0.917765	4.00602e-33
bta-miR-1468	105	35	6.7943	2.5815	-1.39612	1.39594e-07
bta-miR-146b	160	26	10.3532	1.9177	-2.43263	2.6859e-21
bta-miR-148a	2210	155	143.003	11.4322	-3.64487	0
bta-miR-148b	1030	82	66.6486	6.048	-3.46204	1.0997e-183
bta-miR-150	9	23	0.5824	1.6964	1.54239	0.0044667
bta-miR-151	447	123	28.9242	9.072	-1.67278	1.25278e-35
bta-miR-151*	680	168	44.001	12.3911	-1.82823	4.11464e-60
bta-miR-152	13048	1324	844.302	97.6533	-3.11202	0
bta-miR-154	88	1	5.6943	0.0738	-6.26975	3.85105e-23
bta-miR-155	167	9	10.8061	0.6638	-4.02495	9.60751e-35
bta-miR-15a	246	235	15.918	17.3327	0.122837	0.349355
bta-miR-15b	276	32	17.8592	2.3602	-2.91969	3.5996e-43
bta-miR-16a	561	565	36.3009	41.6723	0.199083	0.0205614
bta-miR-16b	440	139	28.4713	10.2521	-1.47359	1.73818e-29
bta-miR-17-3p	149	2	9.6414	0.1475	-6.03046	4.74339e-38
bta-miR-17-5p	265	19	17.1475	1.4014	-3.61306	3.89116e-50
bta-miR-181a	20258	2378	1310.84	175.393	-2.90184	0
bta-miR-181b	9766	529	631.933	39.0171	-4.01759	0
bta-miR-181c	376	22	24.33	1.6226	-3.90636	7.13694e-75
bta-miR-181d	2747	173	177.751	12.7598	-3.80018	0
bta-miR-1839	16048	1937	1038.42	142.866	-2.86166	0
bta-miR-185	5050	1226	326.772	90.4252	-1.85349	0
bta-miR-186	690	131	44.6481	9.6621	-2.20819	1.88262e-77
bta-miR-188	131	3	8.4767	0.2213	-5.25943	6.5671e-32
bta-miR-18a	95	0	6.1472	0.01	-9.26379	1.10026e-26
bta-miR-18b	17	0	1.1	0.01	-6.78136	2.38433e-05
bta-miR-190b	26	1	1.6824	0.0738	-4.51076	1.12109e-06
bta-miR-191	8757	1503	566.643	110.856	-2.35376	0
bta-miR-192	3636	1257	235.276	92.7117	-1.34353	2.618e-201
bta-miR-193a-3p	239	83	15.4651	6.1218	-1.33699	1.22406e-14
bta-miR-193a-5p	123	289	7.959	21.3156	1.42125	8.1431e-22
bta-miR-193b	255	1168	16.5004	86.1474	2.38431	3.3138e-167
bta-miR-194	33	13	2.1353	0.9588	-1.15514	0.0118659
bta-miR-195	22	129	1.4236	9.5146	2.7406	4.55379e-23
bta-miR-196a	381	250	24.6535	18.4391	-0.419024	0.000328595
bta-miR-196b	101	30	6.5354	2.2127	-1.56247	2.00322e-08
bta-miR-197	84	8	5.4354	0.5901	-3.20335	2.90504e-15
bta-miR-199a-3p	246919	7158	15977.5	527.948	-4.9195	0
bta-miR-199a-5p	2263	32	146.433	2.3602	-5.95519	0
bta-miR-199b	1656	127	107.156	9.367	-3.51598	3.8401e-298
bta-miR-199c	812	31	52.5424	2.2864	-4.52233	1.788e-176
bta-miR-19b	460	10	29.7654	0.7376	-5.33465	1.087e-109
bta-miR-204	36	10	2.3295	0.7376	-1.65911	0.0005457
bta-miR-206	1589195	788710	102833	58172.3	-0.821894	0
bta-miR-208b	94	11	6.0825	0.8113	-2.90636	1.53004e-15
bta-miR-20a	124	20	8.0237	1.4751	-2.44345	6.78534e-17
bta-miR-20b	38	1	2.4589	0.0738	-5.05825	8.25989e-10
bta-miR-21	7529	1739	487.182	128.262	-1.92536	0
bta-miR-210	153	14	9.9002	1.0326	-3.26118	3.71428e-27
bta-miR-214	1792	19	115.956	1.4014	-6.37056	0
bta-miR-215	138	11	8.9296	0.8113	-3.46029	7.21628e-26
bta-miR-217	17	2	1.1	0.1475	-2.89872	0.00111484
bta-miR-221	1939	355	125.468	26.1835	-2.26059	1.4043e-220
bta-miR-222	1833	486	118.609	35.8456	-1.72634	4.8507e-147
bta-miR-223	18	7	1.1647	0.5163	-1.17368	0.0638582
bta-miR-22-3p	599	4563	38.7597	336.55	3.11819	0
bta-miR-224	742	4	48.0129	0.295	-7.34656	7.143e-195
bta-miR-22-5p	94	241	6.0825	17.7753	1.54714	9.82607e-21
bta-miR-2284h	44	12	2.8471	0.8851	-1.68558	0.000105465
bta-miR-2284w	299	21	19.3475	1.5489	-3.64283	9.45541e-57
bta-miR-2284x	46548	11654	3012	859.556	-1.80906	0
bta-miR-2299-3p	41	3	2.653	0.2213	-3.58355	1.01917e-08
bta-miR-2300b-3p	24	0	1.553	0.01	-7.27891	2.90141e-07
bta-miR-2344	17	3	1.1	0.2213	-2.31343	0.00388896
bta-miR-2387	245	3	15.8533	0.2213	-6.16264	2.69804e-62
bta-miR-2398	19	2	1.2294	0.1475	-3.05917	0.000380275
bta-miR-23a	2499	1105	161.704	81.5007	-0.988469	5.3373e-86
bta-miR-23b-3p	1669	707	107.997	52.1457	-1.05037	6.27707e-64
bta-miR-23b-5p	47	66	3.0412	4.8679	0.678659	0.0130864
bta-miR-2411	18	11	1.1647	0.8113	-0.521651	0.357096
bta-miR-2422	333	279	21.5476	20.578	-0.0664244	0.573061
bta-miR-2424	16	0	1.0353	0.01	-6.69391	4.47614e-05
bta-miR-24-3p	2520	681	163.063	50.228	-1.69886	5.5099e-197
bta-miR-2443	37	3	2.3942	0.2213	-3.43547	9.58935e-08
bta-miR-2450a	20	2	1.2941	0.1475	-3.13316	0.000220775
bta-miR-2476	51	10	3.3001	0.7376	-2.1616	8.06222e-07
bta-miR-2478	182	13	11.7767	0.9588	-3.61856	6.50791e-35
bta-miR-2484	19	3	1.2294	0.2213	-2.47388	0.0014436
bta-miR-25	16870	1705	1091.61	125.754	-3.11778	0
bta-miR-26a	8544	3336	552.86	246.051	-1.16796	0
bta-miR-26b	7900	2299	511.188	169.566	-1.59201	0
bta-miR-27a-3p	3106	1865	200.981	137.555	-0.547047	2.87329e-39
bta-miR-27b	3652	2185	236.311	161.157	-0.552218	1.2708e-46
bta-miR-28	100	25	6.4707	1.8439	-1.81116	5.80354e-10
bta-miR-2887	517	49	33.4537	3.6141	-3.21046	4.82404e-87
bta-miR-2904	2052	216	132.78	15.9314	-3.05909	0
bta-miR-296	6774	108	438.328	7.9657	-5.78207	0
bta-miR-299	4465	8	288.919	0.5901	-8.93549	0
bta-miR-29a	575	12184	37.2068	898.647	4.59412	0
bta-miR-29b	21	119	1.3589	8.777	2.69129	5.32713e-21
bta-miR-29c	109	3886	7.0531	286.617	5.34472	0
bta-miR-301a	67	0	4.3354	0.01	-8.76002	5.01794e-19
bta-miR-301b	22	0	1.4236	0.01	-7.1534	1.02255e-06
bta-miR-30a-5p	12681	1536	820.555	113.29	-2.85658	0
bta-miR-30b-3p	34	40	2.2001	2.9503	0.423293	0.207376
bta-miR-30b-5p	197	190	12.7474	14.0137	0.136635	0.350288
bta-miR-30c	636	523	41.1539	38.5745	-0.0933817	0.273752
bta-miR-30d	4810	2811	311.243	207.329	-0.586118	1.62366e-67
bta-miR-30e-5p	684	530	44.2599	39.0908	-0.179171	0.0317547
bta-miR-30f	467	52	30.2184	3.8353	-2.97802	2.20804e-73
bta-miR-32	23	8	1.4883	0.5901	-1.33463	0.0197033
bta-miR-320	125705	5832	8134.04	430.147	-4.24107	0
bta-miR-323	6040	10	390.833	0.7376	-9.0495	0
bta-miR-324	90	2	5.8237	0.1475	-5.30315	2.45705e-22
bta-miR-329a	133	1	8.6061	0.0738	-6.86559	2.82292e-35
bta-miR-330	61	5	3.9472	0.3688	-3.41992	5.18821e-12
bta-miR-331	138	66	8.9296	4.8679	-0.875296	3.25784e-05
bta-miR-335	3326	8	215.217	0.5901	-8.51062	0
bta-miR-338	23	8	1.4883	0.5901	-1.33463	0.0197033
bta-miR-339	338	103	21.8711	7.5969	-1.52554	3.92297e-24
bta-miR-339b	133	38	8.6061	2.8027	-1.61854	3.70533e-11
bta-miR-33a	857	38	55.4542	2.8027	-4.30641	1.5774e-180
bta-miR-342	18065	1485	1168.94	109.528	-3.41583	0
bta-miR-3431	337	1	21.8064	0.0738	-8.20692	1.11393e-90
bta-miR-3432	3227	329	208.811	24.2658	-3.1052	0
bta-miR-345-3p	669	167	43.2893	12.3173	-1.81332	1.57417e-58
bta-miR-345-5p	156	62	10.0944	4.5729	-1.14237	3.73888e-08
bta-miR-34c	214	27	13.8474	1.9914	-2.79776	2.03401e-32
bta-miR-361	171	25	11.065	1.8439	-2.58517	3.55591e-24
bta-miR-362-3p	478	79	30.9301	5.8267	-2.40826	6.02582e-60
bta-miR-362-5p	534	28	34.5538	2.0652	-4.06449	9.2976e-109
bta-miR-363	218	2	14.1062	0.1475	-6.57947	1.33655e-56
bta-miR-365-3p	196	513	12.6827	37.837	1.57694	1.77051e-43
bta-miR-365-5p	25	244	1.6177	17.9965	3.4757	4.51863e-53
bta-miR-369-3p	2549	6	164.939	0.4425	-8.54204	0
bta-miR-369-5p	630	4	40.7657	0.295	-7.1105	1.6132e-164
bta-miR-370	51	0	3.3001	0.01	-8.36637	1.1943e-14
bta-miR-374a	388	57	25.1065	4.2041	-2.57819	8.36247e-53
bta-miR-374b	1013	113	65.5486	8.3345	-2.9754	4.5213e-157
bta-miR-376a	117	0	7.5708	0.01	-9.5643	1.05605e-32
bta-miR-376b	1954	3	126.438	0.2213	-9.15821	0
bta-miR-376c	484	2	31.3184	0.1475	-7.73015	1.1222e-128
bta-miR-376d	145	2	9.3826	0.1475	-5.9912	5.58693e-37
bta-miR-377	58	2	3.753	0.1475	-4.66926	6.03304e-14
bta-miR-378	41572	24882	2690.02	1835.2	-0.551674	0
bta-miR-379	4794	50	310.207	3.6878	-6.39433	0
bta-miR-380-3p	4071	12	263.424	0.8851	-8.21733	0
bta-miR-381	997	0	64.5133	0.01	-12.6554	2.0478e-273
bta-miR-382	22707	134	1469.31	9.8833	-7.21593	0
bta-miR-383	356	13	23.0358	0.9588	-4.5865	7.43792e-79
bta-miR-409a	1657	9	107.22	0.6638	-7.33561	0
bta-miR-410	908	2	58.7543	0.1475	-8.63784	4.1106e-244
bta-miR-411	22786	179	1474.42	13.2024	-6.80321	0
bta-miR-412	19	0	1.2294	0.01	-6.94181	6.7654e-06
bta-miR-421	98	8	6.3413	0.5901	-3.42575	1.355e-18
bta-miR-423-3p	815	191	52.7365	14.0875	-1.90439	1.16478e-75
bta-miR-423-5p	94633	25630	6123.46	1890.37	-1.69567	0
bta-miR-424	1366	25	88.3903	1.8439	-5.58306	0
bta-miR-424*	3580	12	231.653	0.8851	-8.03191	0
bta-miR-425-3p	57	4	3.6883	0.295	-3.64417	7.8532e-12
bta-miR-425-5p	104	11	6.7296	0.8113	-3.05221	7.84943e-18
bta-miR-431	145	0	9.3826	0.01	-9.87384	2.31555e-40
bta-miR-432	152450	244	9864.64	17.9965	-9.09841	0
bta-miR-433	13185	16	853.167	1.1801	-9.49778	0
bta-miR-449a	20	1	1.2941	0.0738	-4.13218	3.89704e-05
bta-miR-450	939	3	60.7603	0.2213	-8.10098	2.1421e-250
bta-miR-451	4073	279	263.553	20.578	-3.67892	0
bta-miR-452	5232	13	338.549	0.9588	-8.46392	0
bta-miR-455	186	2	12.0356	0.1475	-6.35045	5.54288e-48
bta-miR-455*	314	29	20.3181	2.1389	-3.24782	4.89704e-54
bta-miR-483	264	0	17.0828	0.01	-10.7383	6.51285e-73
bta-miR-484	223	13	14.4298	0.9588	-3.91168	4.95638e-45
bta-miR-485	4513	52	292.024	3.8353	-6.25061	0
bta-miR-486	7361	7971	476.311	587.912	0.303695	8.40551e-39
bta-miR-487a	195	0	12.6179	0.01	-10.3013	4.87318e-54
bta-miR-487b	10420	21	674.251	1.5489	-8.7659	0
bta-miR-490	29	0	1.8765	0.01	-7.5519	1.2443e-08
bta-miR-493	1112	1	71.9546	0.0738	-9.92925	3.7281e-302
bta-miR-494	6880	65	445.187	4.7942	-6.53698	0
bta-miR-495	33627	48	2175.92	3.5403	-9.26354	0
bta-miR-496	517	0	33.4537	0.01	-11.708	4.064e-142
bta-miR-497	29	160	1.8765	11.801	2.65279	2.56824e-27
bta-miR-499	58539	1271	3787.91	93.7443	-5.33653	0
bta-miR-500	136	6	8.8002	0.4425	-4.31379	7.84514e-30
bta-miR-502a	1886	285	122.038	21.0205	-2.53746	1.2918e-245
bta-miR-502b	125	11	8.0884	0.8113	-3.31755	9.32437e-23
bta-miR-504	480	229	31.0596	16.8902	-0.878853	6.19433e-15
bta-miR-505	20	1	1.2941	0.0738	-4.13218	3.89704e-05
bta-miR-532	6851	315	443.31	23.2332	-4.25406	0
bta-miR-539	56	0	3.6236	0.01	-8.50128	5.1219e-16
bta-miR-541	428	0	27.6948	0.01	-11.4354	8.9894e-118
bta-miR-542-5p	1496	1	96.8023	0.0738	-10.3572	0
bta-miR-543	35164	57	2275.37	4.2041	-9.08009	0
bta-miR-615	22	0	1.4236	0.01	-7.1534	1.02255e-06
bta-miR-654	33	0	2.1353	0.01	-7.73829	1.00179e-09
bta-miR-655	3639	4	235.47	0.295	-9.64061	0
bta-miR-656	29	0	1.8765	0.01	-7.5519	1.2443e-08
bta-miR-660	13783	891	891.862	65.7169	-3.76248	0
bta-miR-665	1287	8	83.2784	0.5901	-7.14084	0
bta-miR-7	69	8	4.4648	0.5901	-2.91956	8.68858e-12
bta-miR-708	295	7	19.0887	0.5163	-5.20837	4.68366e-70
bta-miR-744	437	16	28.2771	1.1801	-4.58265	1.99672e-96
bta-miR-767	284	15	18.3769	1.1063	-4.05408	1.99417e-58
bta-miR-874	51	9	3.3001	0.6638	-2.31369	2.71175e-07
bta-miR-876	23	0	1.4883	0.01	-7.21752	5.44686e-07
bta-miR-877	85	7	5.5001	0.5163	-3.41318	3.0327e-16
bta-miR-885	1	90	0.0647	6.6381	6.68086	8.52401e-29
bta-miR-9	78	2	5.0472	0.1475	-5.0967	3.5791e-19
bta-miR-9*	19	0	1.2294	0.01	-6.94181	6.7654e-06
bta-miR-92	8112	770	524.907	56.7924	-3.20829	0
bta-miR-92a	8367	789	541.407	58.1937	-3.21778	0
bta-miR-92b	426	11	27.5654	0.8113	-5.08648	1.9035e-99
bta-miR-93	825	187	53.3836	13.7924	-1.95252	4.3537e-79
bta-miR-935	20	7	1.2941	0.5163	-1.32567	0.0311864
bta-miR-95	347	280	22.4535	20.6518	-0.120673	0.299191
bta-miR-98	2929	345	189.528	25.4459	-2.89691	0
bta-miR-99a	4176	1161	270.218	85.6311	-1.65792	3.77540023054872e-314
bta-miR-99a*	301	62	19.4769	4.5729	-2.09058	1.65569e-32
bta-miR-99b	4094	279	264.912	20.578	-3.68634	0
